# Supplementary material
Source: ML conference proceedings conference paper supplement (https://proceedings.mlr.press/v73/pena17a.html)

## Causal Effect Identification in Alternative Acyclic Directed Mixed Graphs - Supplementary Material

**Jose M. Peña**  
 Linköping University  
 Linköping (Sweden)

JOSE.M.PENA@LIU.SE

**Proof of Lemma 1** To prove the first statement, note that

$$\begin{aligned} f(v) &= \int [\prod_i f(v_i|pa_G(V_i), u_i)] f(u) du = \int [\prod_i f(v_i|pa_G(V_i), u_i)] \prod_j f(u_{S_j}) du \\ &= \prod_j \int \prod_{V_i \in S_j} f(v_i|pa_G(V_i), u_i) f(u_{S_j}) du_{S_j} = \prod_j q(s_j) \end{aligned}$$

where the second equality follows from Equation 6.

We prove the second statement by induction over the number of variables in  $V$ . Clearly, the result holds when  $V$  contains a single variable. Assume as induction hypothesis that the result holds for up to  $n$  variables. When there are  $n + 1$  variables, these can be divided into components  $S_1, \dots, S_k, S'$  with factors  $q(s_1), \dots, q(s_k), q(s')$  such that  $V_{n+1} \in S'$ . As shown above,

$$f(v) = q(s') \prod_j q(s_j)$$

which implies that

$$f(v^{(n)}) = \int f(v) dv_{n+1} = [\int q(s') dv_{n+1}] \prod_j q(s_j).$$

Note that  $f(v^{(n)})$  factorizes according to  $G^{V^{(n)}}$  and  $S_j$  is a component of  $G^{V^{(n)}}$ . Therefore,

$$q(s_j) = \prod_{V_i \in S_j} f(v_i|v^{(i-1)})$$

by the induction hypothesis and the fact that  $V_1 < \dots < V_n$  is also a topological order of the nodes in  $G^{V^{(n)}}$ . Then,  $q(s')$  is also identifiable and is given by

$$q(s') = \frac{f(v)}{\prod_j q(s_j)} = \frac{\prod_i f(v_i|v^{(i-1)})}{\prod_j q(s_j)} = \prod_{V_i \in S'} f(v_i|v^{(i-1)}).$$

■

**Proof of Lemma 2**

$$\begin{aligned}
 \int q(c) d(c \setminus e) &= \int \int \left[ \prod_{V_i \in E} f(v_i | pa_G(V_i), u_i) \prod_{V_i \in C \setminus E} f(v_i | pa_G(V_i), u_i) \right] f(u) du d(c \setminus e) \\
 &= \int \left[ \prod_{V_i \in E} f(v_i | pa_G(V_i), u_i) \int \prod_{V_i \in C \setminus E} f(v_i | pa_G(V_i), u_i) d(c \setminus e) \right] f(u) du \\
 &= \int \left[ \prod_{V_i \in E} f(v_i | pa_G(V_i), u_i) \right] f(u) du = q(e)
 \end{aligned}$$

where the second equality follows from the fact that  $E$  is an ancestral set in  $G^C$  and, thus, no node in  $E$  has a parent in  $C \setminus E$ . The third equality is due to the fact that the integral over  $c \setminus e$  equals 1. This may be easier to appreciate by performing the integral following a topological order of the nodes in  $C \setminus E$  with respect to  $G$ . ■

**Proof of Lemma 3** As mentioned above,  $q(c)$  factorizes according to  $G^C$ . Therefore, the first statement can be proven in much the same way as the first statement in Lemma 1. The third statement follows from Lemma 2 since  $C^{(i)}$  is an ancestral set in  $G^C$ .

We prove the second statement by induction over the number of variables in  $C$ . Clearly, the result holds when  $C$  contains a single variable. Assume as induction hypothesis that the result holds for up to  $n$  variables. When there are  $n + 1$  variables, these can be divided into components  $C_1, \dots, C_k, C'$  with factors  $q(c_1), \dots, q(c_k), q(c')$  such that  $V_{n+1} \in C'$ . As shown above,

$$q(c) = q(c') \prod_j q(c_j)$$

which implies that

$$q(c^{(n)}) = \int q(c) dv_{n+1} = \left[ \int q(c') dv_{n+1} \right] \prod_j q(c_j)$$

where the first equality follows from Lemma 2 because  $C^{(n)}$  is an ancestral set in  $G^C$ . Note that  $q(c^{(n)})$  factorizes according to  $G^{C^{(n)}}$  and  $C_j$  is a component of  $G^{C^{(n)}}$ . Therefore,

$$q(c_j) = \prod_{V_i \in C_j} \frac{q(c^{(i)})}{q(c^{(i-1)})}$$

by the induction hypothesis and the fact that  $V_1 < \dots < V_n$  is also a topological order of the nodes in  $G^{C^{(n)}}$ . Then,  $q(c')$  is given by

$$q(c') = \frac{q(c)}{\prod_j q(c_j)} = \frac{q(c^{(n+1)})}{\prod_j q(c_j)} = \frac{\prod_{i=1}^{n+1} \frac{q(c^{(i)})}{q(c^{(i-1)})}}{\prod_j q(c_j)} = \prod_{V_i \in C'} \frac{q(c^{(i)})}{q(c^{(i-1)})}.$$

■

**Proof of Lemma 4** It suffices to note that

$$q(c|a) = f(c|v \widehat{\setminus \{a, c\}}, a) = \frac{f(a, c|v \widehat{\setminus \{a, c\}})}{f(a|v \widehat{\setminus \{a, c\}})} = \frac{q(a, c)}{\int q(a, c) dc}.$$

Moreover, if  $A$  is an ancestral set in  $G^{AUC}$ , then  $\int q(a, c) dc = q(a)$  by Lemma 2.  $\blacksquare$

**Proof of Theorem 9** For the algorithm to fail, some component  $C_j$  cannot be ancestral in line 8. Then, one of the following two cases must occur. Case 1: Assume that  $C_j$  is not ancestral in line 8 because it contains a child  $Y_n$  of  $X$ . Clearly,  $X$  is not in  $C_j$  by lines 4-5. However, both  $X$  and  $Y_n$  must be in the component  $S_i$  in line 8 for the algorithm to fail, which implies that there is an undirected path between  $X$  and  $Y_n$ . Case 2: Assume that  $C_j$  is not ancestral in line 8 because it contains a child  $Y_j$  of  $Y_i$  and  $Y_i$  is not in  $C_j$ . However, both  $Y_i$  and  $Y_j$  must be in the component  $S_i$  in line 8 for the algorithm to fail, then both must be in  $C_j$  by lines 4-5. This is a contradiction. Therefore, only the first case can occur, which implies that the algorithm fails only if  $G$  has a subgraph of the form

$$\begin{array}{c} & Y_1 - \dots - Y_{n-1} & \\ X & \xrightarrow{\hspace{10em}} & Y_n \end{array}$$

Such a subgraph implies that  $f(v \setminus x|\hat{x})$  is not identifiable from  $G$  (Peña and Bendtsen, 2017, Theorem 12).  $\blacksquare$

**Proof of Lemma 10** Removing edges from an aADMG can only increase the separations represented by the aADMG. Then, if the antecedent of rule 1 is satisfied, so are the antecedents of rules 2 and 3. Then, we can replace the application of rule 1 with the application of rule 2 followed by the application of rule 3, i.e.

$$f(y|\hat{x}, z, w) = f(y|\hat{x}, \hat{z}, w) = f(y|\hat{x}, w).$$

$\blacksquare$

**Proof of Lemma 11** We prove the result for Lemma 2. The proof for Lemma 6 is similar. First, note that

$$\int q(c) d(c \setminus e) = \int f(c|v \widehat{\setminus c}) d(c \setminus e) = f(e|v \widehat{\setminus c}).$$

Moreover,

$$q(e) = f(e|v \widehat{\setminus e}) = f(e|v \widehat{\setminus c})$$

where the second equality follows from rule 3 since  $E \perp_{G_{\widehat{V \setminus C \setminus E}}} C \setminus E | \emptyset$ . To see that this separation holds, assume that there is a route  $\rho$  in  $G_{\widehat{V \setminus C \setminus E}}$  between a node in  $E$  and a node in  $C \setminus E$ . Note that  $\rho$  cannot only contain nodes in  $\widehat{C}$ , because the nodes in  $C \setminus E$  only have outgoing directed edges in  $G_{\widehat{V \setminus C \setminus E}}$ , which implies that  $E$  is not ancestral set in  $G^C$ ,

which contradicts the assumptions in Lemma 2. So,  $\rho$  must contain some node in  $V \setminus C$ . Note however that some node in  $V \setminus C$  must be a collider in  $\rho$  because, in  $G_{\overrightarrow{V \setminus C \setminus E}}$ , the nodes in  $V \setminus C$  only have undirected edges whereas the nodes in  $C \setminus E$  only have outgoing directed edges. Therefore,  $\rho$  is not connecting given  $\emptyset$ . ■

**Proof of Lemma 12** We prove the result for Lemma 1. The proofs for Lemmas 3, 5 and 7 are similar. Moreover, we only prove the first statement in Lemma 1, because the proof of the second statement provided in Lemma 1 only involves standard probability manipulations. Likewise, we do not need to prove the third statement of Lemmas 3 and 7 because, as shown in the proof of those lemmas, it follows from Lemma 2, which follows from rule 3 as shown in Lemma 11.

Let  $V$  be partitioned into components  $S_1, \dots, S_k$  for the aADMG  $G$ . Moreover, assume without loss of generality that if the edge  $A \rightarrow B$  is in  $G$ , then  $A \in S_i$  and  $B \in S_j$  with  $i \leq j$ . Let  $S_{<j} = \bigcup_{i < j} S_i$  and  $S_{\leq j} = \bigcup_{i \leq j} S_i$ . Note that

$$f(v) = \prod_j f(s_j | s_{<j}).$$

Moreover,

$$f(s_j | s_{<j}) = f(s_j | \widehat{v \setminus s_{\leq j}}, s_{<j})$$

by rule 3 since  $S_j \perp_{G_{\overrightarrow{V \setminus S_{\leq j}}}} V \setminus S_{\leq j} | S_{<j}$ . To see that this separation holds, assume that there is a route  $\rho$  in  $G_{\overrightarrow{V \setminus S_{\leq j}}}$  between a node in  $S_j$  and a node in  $V \setminus S_{\leq j}$ . Note that the nodes in  $V \setminus S_{\leq j}$  only have outgoing directed edges in  $G_{\overrightarrow{V \setminus S_{\leq j}}}$ . Therefore,  $\rho$  implies that some node in  $V \setminus S_{\leq j}$  is an ancestor in  $G$  of some node in  $S_{\leq j}$ , which contradicts our assumption above.

Finally, note that

$$f(s_j | \widehat{v \setminus s_{\leq j}}, s_{<j}) = f(s_j | \widehat{v \setminus s_j}) = q(s_j)$$

where the first equality follows from rule 2 because  $S_j \perp_{G_{\overrightarrow{V \setminus S_{\leq j} S_{<j}}}} S_{<j} | \emptyset$ . To see that this separation holds, assume that there is a route  $\rho$  in  $G_{\overrightarrow{V \setminus S_{\leq j} S_{<j}}}$  between a node in  $S_j$  and a node in  $S_{<j}$ . Then, there exist two nodes  $A \in S_j$  and  $B \in S_{<j}$  that are adjacent in  $\rho$  or there exist two nodes  $A' \in S_j$  and  $B' \in V \setminus S_{\leq j}$  that are adjacent in  $\rho$ . However, either case implies a contradiction:

- $A - B$  contradicts that  $S_j$  is a component.
- $A \rightarrow B$  contradicts our assumption above.
- $A \leftarrow B$  contradicts that  $B$  has no outgoing directed edge in  $G_{\overrightarrow{V \setminus S_{\leq j} S_{<j}}}$ .
- $A' - B'$  contradicts that  $S_j$  is a component
- $A' \rightarrow B'$  and  $A' \leftarrow B'$  contradict that  $B'$  only has undirected edges in  $G_{\overrightarrow{V \setminus S_{\leq j} S_{<j}}}$ .

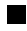

Supplement: Supplementary file 1 [file pena17a-supp.pdf]
